# Supplementary material for: Reference values for IGF-I serum concentration in an adult population: use of the VARIETE cohort for two new immunoassays
Source: PubMed Central journal article supplement — Endocr Connect. 2021 Aug 3;10(9):1027–34. doi: 10.1530/EC-21-0175 (PMC8428081; doi:10.1530/ec-21-0175), 2021-08-03

**Supplemental figure 1** - Individual points and fitted percentiles for males and females for the 2 new immunoassays tested. Displayed are the 2.5% (green line) and 97.5% (blue line) percentiles and the median (red line) constructed for each assay by using the LMS method.

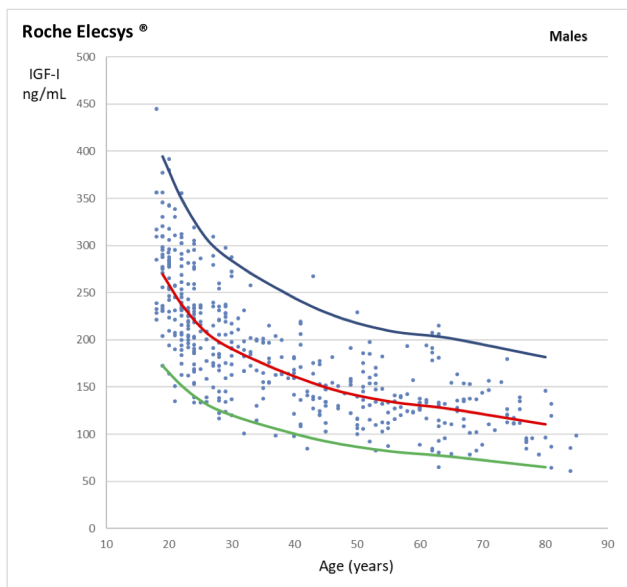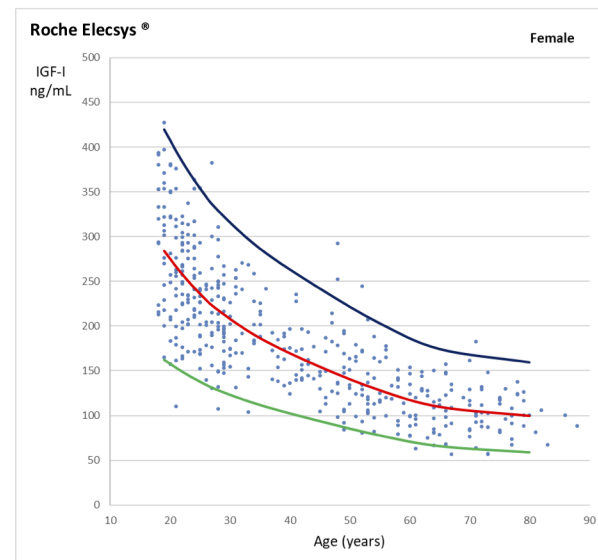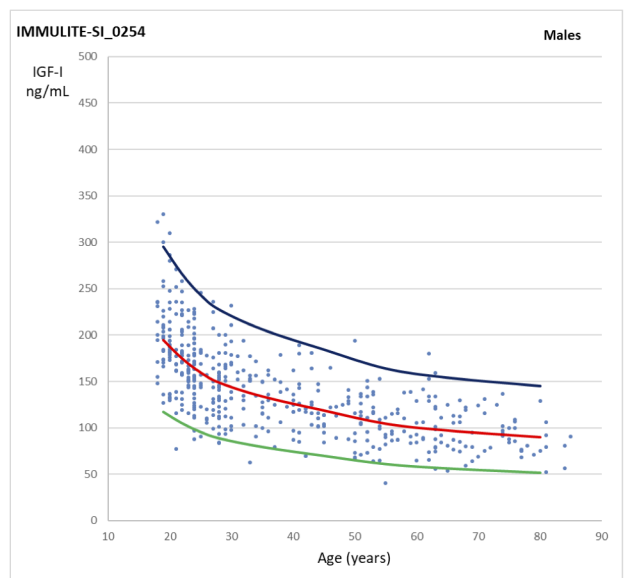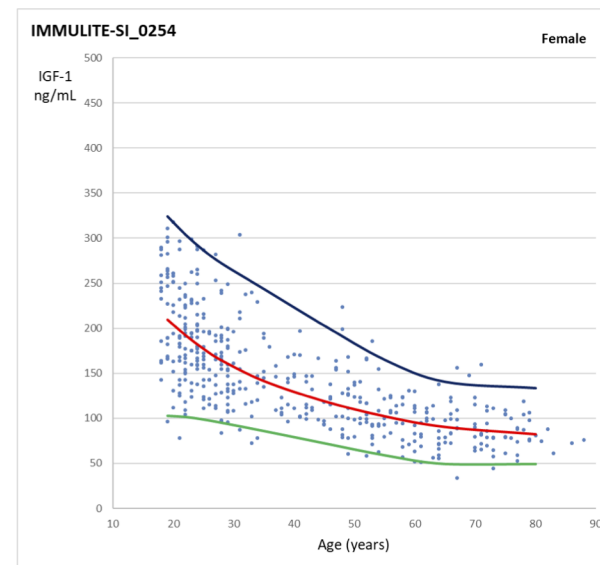

Supplement: supplementary_figure_1.pdf [file supplementary_figure_1.pdf]
