# Supplementary material for: Reference values for IGF-I serum concentration in an adult population: use of the VARIETE cohort for two new immunoassays
Source: PubMed Central journal article supplement — Endocr Connect. 2021 Aug 3;10(9):1027–34. doi: 10.1530/EC-21-0175 (PMC8428081; doi:10.1530/ec-21-0175), 2021-08-03

**Supplemental figure 5:** Comparison of the IGF-I levels measured by the 8 immunoassays in a healthy population. Bland-Altman plots of Z-score

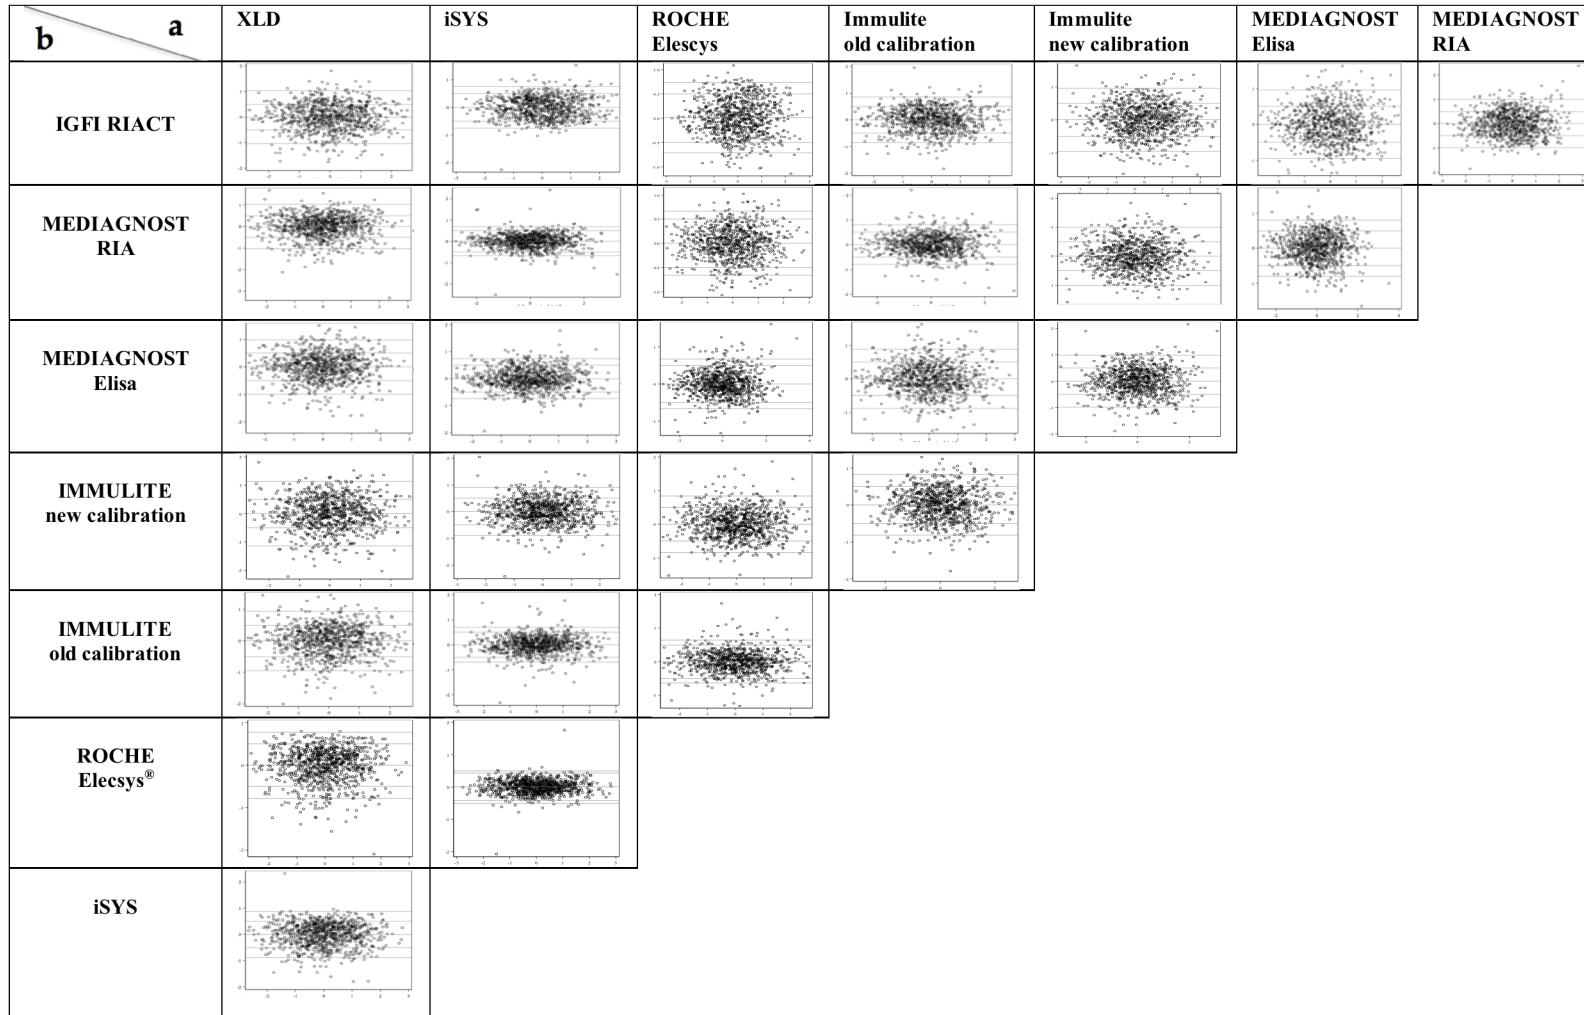

Supplement: supplementary_figure_5.pdf [file supplementary_figure_5.pdf]
