# Supplementary material for: Reference values for IGF-I serum concentration in an adult population: use of the VARIETE cohort for two new immunoassays
Source: PubMed Central journal article supplement — Endocr Connect. 2021 Aug 3;10(9):1027–34. doi: 10.1530/EC-21-0175 (PMC8428081; doi:10.1530/ec-21-0175), 2021-08-03
Supplement: supplementary_material.pdf [file supplementary_material.pdf]

## **Supplemental Text**

### **VAleurs de Référence de l'IGF-I Et Transformation En Z-score (VARIETE) study**

#### **List of the Investigators**

##### **Endocrinology Clinical Centers**

Pr Philippe Chanson (Le Kremlin-Bicêtre)  
Pr Jean-Claude Souberbielle (Paris)  
Pr Fabrice Bonnet (Rennes)  
Dr Christine Cortet-Rudelli (Lille)  
Pr Françoise Borson-Chazot (Lyon)  
Pr Patrice Rodien (Angers)  
Pr Olivier Chabre (Grenoble)  
Pr Jean-Louis Schlienger (Strasbourg)  
Pr Philippe Bouchard (Paris)  
Pr Sophie Christin-Maitre (Paris)  
Pr Véronique Kerlan (Brest)  
Pr Antoine Tabarin (Bordeaux)  
Pr Philippe Caron (Toulouse)  
Pr Jean-Marc Kuhn (Rouen)  
Pr Alfred Penfornis (Besançon)  
Pr Jean-Louis Sadoul (Nice)  
Pr Bruno Estour (Saint-Étienne)  
Pr. Thierry Brue (Marseille)

##### **Clinical Centers for Investigation**

Dr Catherine Cornu (Lyon)  
Dr Jean-Luc Cracowski (Grenoble)  
Pr Michel Azizi (Paris)  
Dr Karine Lacut (Brest)  
Pr. Olivier Blin (Marseille)  
Dr. Anne Cailleux (Rouen)

##### **Hormonal Biochemical Centers**

Dr Catherine Massart (Rennes)  
Dr Sylvie Brailly-Tabard (Le Kremlin-Bicêtre)  
Dr Didier Chevenne (Paris)  
Pr Yves Le Bouc (Paris)  
Dr Patricia Panaia-Ferrari (Nice)  
Dr Bruno Claustrat (Lyon)
