# Supplementary material for: Reference values for IGF-I serum concentration in an adult population: use of the VARIETE cohort for two new immunoassays
Source: PubMed Central journal article supplement — Endocr Connect. 2021 Aug 3;10(9):1027–34. doi: 10.1530/EC-21-0175 (PMC8428081; doi:10.1530/ec-21-0175), 2021-08-03
Supplement: supplementary_table_1.pdf [file supplementary_table_1.pdf]

**Supplemental Table 1 : Conversion formula for calculating IGF-1 SDS**

$$\text{IGF-1 SDS} = [1 / (\text{SD} * \text{L})] * [(\text{IGF-1} / \text{M})^{\text{L}} - 1]$$

SD : standard deviation ; L : lambda ; IGF-1 : raw value given by the assay in ng/ml ; M : median

**1. Siemens Immulite 2000 new calibration :****Immulite 2000 new calibration : males**

| Age groups  | n  | 2.5th percentile | 97.5th percentile | Median (M)   | Standard deviation (SD) | Lambda (L)   |
|-------------|----|------------------|-------------------|--------------|-------------------------|--------------|
| 18-20 years | 56 | 116.990          | 294.954           | 194.49625595 | 0.2328003615            | 0.432814325  |
| 21-23 years | 60 | 105.015          | 266.078           | 174.94405322 | 0.2341398753            | 0.4240318088 |
| 24-26 years | 54 | 95.628           | 243.503           | 159.63012407 | 0.2354870927            | 0.4152492657 |
| 27-29 years | 50 | 88.914           | 227.545           | 148.72517164 | 0.2368420549            | 0.4064666812 |
| 30-39 years | 55 | 79.658           | 206.279           | 133.87712812 | 0.2400339878            | 0.3859737769 |
| 40-49 years | 49 | 70.062           | 184.565           | 118.54781793 | 0.2446685557            | 0.3566976568 |
| 50-59 years | 54 | 61.228           | 164.138           | 104.30128392 | 0.2493923984            | 0.3274209486 |
| 60-69 years | 48 | 56.566           | 154.365           | 97.006828037 | 0.2542068014            | 0.2981437289 |
| 70-89 years | 34 | 51.861           | 145.463           | 89.832889651 | 0.2616019064            | 0.2542275483 |

**Immulite 2000 new calibration : females**

| Age groups  | n  | 2.5th percentile | 97.5th percentile | Median (M)   | Standard deviation (SD) | Lambda (L)   |
|-------------|----|------------------|-------------------|--------------|-------------------------|--------------|
| 18-20 years | 42 | 102.361          | 323.937           | 209.71772777 | 0.2707080346            | 0.8874823245 |
| 21-23 years | 55 | 101.170          | 303.598           | 192.29078871 | 0.2697612157            | 0.6264675361 |
| 24-26 years | 45 | 98.317           | 286.216           | 177.1454764  | 0.2688177041            | 0.3845346927 |
| 27-29 years | 48 | 94.755           | 271.589           | 164.31709294 | 0.2678774827            | 0.1734424787 |
| 30-39 years | 45 | 85.699           | 243.331           | 141.53918897 | 0.2656962891            | -0.147456537 |
| 40-49 years | 50 | 72.348           | 202.825           | 119.14007861 | 0.2626105939            | -0.125167729 |
| 50-59 years | 54 | 59.183           | 164.799           | 102.34289782 | 0.2595601049            | 0.2728056826 |
| 60-69 years | 47 | 49.749           | 140.498           | 90.553996342 | 0.2565444788            | 0.6022444431 |
| 70-89 years | 50 | 49.683           | 133.575           | 82.47758725  | 0.2520858224            | 0.101178459  |

## 2. ROCHE Elecsys®

### ROCHE Elecsys® : males

| Age groups  | n  | 2.5th percentile | 97.5th percentile | Median (M)   | Standard deviation (SD) | Lambda (L)   |
|-------------|----|------------------|-------------------|--------------|-------------------------|--------------|
| 18-20 years | 57 | 172.923          | 394.649           | 269.94043488 | 0.2087287086            | 0.3867740554 |
| 21-23 years | 62 | 152.064          | 350.122           | 238.33128135 | 0.2110433236            | 0.3738365709 |
| 24-26 years | 51 | 136.337          | 316.724           | 214.5425372  | 0.2133835922            | 0.3608990761 |
| 27-29 years | 43 | 125.501          | 294.194           | 198.29024876 | 0.215749791             | 0.3479615664 |
| 30-39 years | 55 | 109.843          | 263.063           | 175.19887123 | 0.2213733868            | 0.3177740134 |
| 40-49 years | 50 | 92.715           | 229.163           | 149.90792435 | 0.2296622767            | 0.2746491613 |
| 50-59 years | 54 | 82.175           | 209.872           | 134.70245779 | 0.2382617455            | 0.2315251555 |
| 60-69 years | 49 | 76.299           | 201.608           | 126.81079165 | 0.2471833524            | 0.1884021925 |
| 70-89 years | 34 | 65.222           | 181.826           | 110.68276648 | 0.261195544             | 0.1237189437 |

### ROCHE Elecsys® : females

| Age groups  | n  | 2.5th percentile | 97.5th percentile | Median (M)   | Standard deviation (SD) | Lambda (L)   |
|-------------|----|------------------|-------------------|--------------|-------------------------|--------------|
| 18-20 years | 42 | 162.210          | 419.334           | 283.65972621 | 0.232267583             | 0.7609204384 |
| 21-23 years | 55 | 149.036          | 383.807           | 257.78396334 | 0.2332866483            | 0.6816307996 |
| 24-26 years | 45 | 137.696          | 353.639           | 235.79861178 | 0.234310193             | 0.6043233934 |
| 27-29 years | 48 | 128.269          | 328.900           | 217.70150259 | 0.2353382405            | 0.5303917489 |
| 30-39 years | 47 | 111.657          | 286.361           | 186.42699201 | 0.2377546469            | 0.3780661887 |
| 40-49 years | 50 | 93.604           | 241.907           | 154.43366564 | 0.241249812             | 0.2307529513 |
| 50-59 years | 54 | 77.611           | 203.125           | 128.2588036  | 0.2447961633            | 0.184193248  |
| 60-69 years | 48 | 65.653           | 174.413           | 109.68489934 | 0.2483943279            | 0.2073827132 |
| 70-89 years | 50 | 58.684           | 159.517           | 99.678551331 | 0.2538905075            | 0.2389177599 |
